# Supplementary material for: Characterization of mTOR Activity and Metabolic Profile in Pediatric Rhabdomyosarcoma
Source: PubMed Central journal article supplement (PMC7409076; doi:10.3390/cancers12071947), 2020-07-17
Supplement: cancers-12-01947-s001.pdf [file cancers-12-01947-s001.pdf]

## Supplementary Materials

# Characterization of mTOR Activity and Metabolic Profile in Pediatric Rhabdomyosarcoma

Luca Felkai, Ildikó Krencz, Dorottya Judit Kiss, Noémi Nagy, Gábor Petóvári, Titanilla Dankó, Tamás Micsík, András Khor, Tamás Tornóczky, Zoltán Sápi, Anna Sebestyén and Monika Csóka

**Table S1.** The relevant clinicopathological characteristics of the studied patients.

| Case No. | Primary | After Preoperative Therapy | Relapse | Fusion Status | Histological Subtype | Risk Group | Gender |
|----------|---------|----------------------------|---------|---------------|----------------------|------------|--------|
| 1        | x       |                            |         | positive      | alveolar             | HR         | male   |
| 2        | x       |                            |         | negative      | spindle cell         | HR         | male   |
| 3        | x       |                            | x       | negative      | embryonal            | HR         | female |
| 4        | x       |                            |         | negative      | embryonal            | HR         | female |
| 5        | x       |                            |         | negative      | embryonal            | HR         | female |
| 6        |         | x                          |         | negative      | embryonal            | HR         | male   |
| 7        | x       |                            |         | negative      | embryonal            | HR         | female |
| 8        | x       |                            |         | negative      | embryonal            | MR         | female |
| 9        | x       | x                          |         | negative      | embryonal            | HR         | female |
| 10       | x       |                            | x       | negative      | embryonal            | HR         | female |
| 11       | x       |                            | x       | negative      | embryonal            | HR         | male   |
| 12       | x       |                            |         | negative      | embryonal            | HR         | male   |
| 13       | x       |                            | x       | negative      | embryonal            | HR         | male   |
| 14       | x       |                            | x       | negative      | embryonal            | MR         | female |
| 15       | x       |                            |         | negative      | embryonal            | MR         | male   |
| 16       | x       |                            |         | negative      | embryonal            | HR         | male   |
| 17       | x       |                            |         | negative      | embryonal            | MR         | male   |
| 18       | x       |                            |         | negative      | embryonal            | MR         | male   |
| 19       | x       | x                          |         | negative      | botryoid             | HR         | female |
| 20       | x       |                            |         | negative      | embryonal            | HR         | female |
| 21       | x       |                            |         | negative      | embryonal            | SR         | female |
| 22       | x       |                            |         | positive      | alveolar             | HR         | female |
| 23       | x       |                            |         | negative      | embryonal            | MR         | male   |
| 24       | x       |                            |         | negative      | embryonal            | MR         | male   |
| 25       | x       |                            |         | negative      | embryonal            | HR         | male   |
| 26       | x       |                            |         | negative      | embryonal            | HR         | male   |
| 27       |         |                            | x       | negative      | embryonal            | HR         | male   |
| 28       | x       |                            | x       | positive      | alveolar             | HR         | male   |
| 29       | x       | x                          | x       | negative      | embryonal            | HR         | female |
| 30       | x       | x                          |         | positive      | alveolar             | HR         | female |
| 31       | x       |                            |         | negative      | embryonal            | MR         | male   |
| 32       | x       |                            |         | negative      | embryonal            | MR         | male   |
| 33       | x       |                            | x       | negative      | embryonal            | HR         | male   |
| 34       | x       |                            |         | negative      | embryonal            | HR         | female |
| 35       | x       |                            |         | negative      | embryonal            | HR         | male   |
| 36       | x       |                            |         | negative      | spindle cell         | HR         | male   |
| 37       | x       | x                          | x       | negative      | embryonal            | HR         | female |
| 38       | x       |                            |         | negative      | embryonal            | HR         | male   |
| 39       | x       | x                          |         | negative      | embryonal            | HR         | female |
| 40       | x       |                            |         | negative      | embryonal            | MR         | male   |
| 41       | x       |                            |         | negative      | embryonal            | HR         | male   |
| 42       | x       | x                          |         | positive      | alveolar             | HR         | male   |
| 43       | x       | x                          |         | negative      | embryonal            | HR         | male   |
| 44       | x       |                            |         | negative      | spindle cell         | HR         | female |
| 45       | x       |                            |         | negative      | embryonal            | HR         | female |
| 46       | x       |                            |         | negative      | embryonal            | HR         | male   |
| 47       | x       |                            |         | negative      | embryonal            | MR         | male   |
| 48       |         |                            | x       | negative      | embryonal            | HR         | female |

**Table S2.** The mean and median H-score results and the belonging probability values of the primary and recurrent samples according to PAX-FOXO fusion status, risk stratification and survival. .

|                 | Total no. | pmTOR |        |          | pS6  |        |          | Rictor |        |          | PFK  |        |          | LDHA |        |          | G6PDH |        |          | ATPB |        |          | GLS  |        |          |
|-----------------|-----------|-------|--------|----------|------|--------|----------|--------|--------|----------|------|--------|----------|------|--------|----------|-------|--------|----------|------|--------|----------|------|--------|----------|
|                 |           | mean  | median | <i>p</i> | mean | median | <i>p</i> | mean   | median | <i>p</i> | mean | median | <i>p</i> | mean | median | <i>p</i> | mean  | median | <i>p</i> | mean | median | <i>p</i> | mean | median | <i>p</i> |
| Primary         |           |       |        |          |      |        |          |        |        |          |      |        |          |      |        |          |       |        |          |      |        |          |      |        |          |
| Fusion negative | 40        | 107   | 120    | 0.366    | 51   | 38     | 0.148    | 140    | 140    | 0.02     | 43   | 8      | 0.214    | 110  | 110    | 0.985    | 139   | 146    | 0.597    | 100  | 98     | 0.485    | 120  | 137    | 0.448    |
| Fusion positive | 5         | 137   | 143    |          | 16   | 13     |          | 189    | 193    |          | 79   | 103    |          | 104  | 80     |          | 125   | 124    |          | 99   | 63     |          | 101  | 108    |          |
| Low risk        | 12        | 133   | 153    | 0.095    | 49   | 58     | 0.418    | 149    | 143    | 0.668    | 30   | 3      | 0.185    | 132  | 149    | 0.126    | 142   | 151    | 0.626    | 65   | 54     | 0.626    | 122  | 129    | 0.626    |
| High risk       | 33        | 101   | 115    |          | 46   | 20     |          | 145    | 150    |          | 53   | 18     |          | 100  | 94     |          | 135   | 133    |          | 83   | 75     |          | 116  | 135    |          |
| Survived        | 32        | 108   | 121    | 0.634    | 48   | 32     | 0.773    | 146    | 150    | 0.599    | 44   | 12     | 0.723    | 114  | 125    | 0.475    | 141   | 146    | 0.288    | 83   | 70     | 0.79     | 115  | 129    | 0.867    |
| Progressed      | 13        | 115   | 122    |          | 44   | 30     |          | 138    | 135    |          | 54   | 10     |          | 99   | 78     |          | 124   | 124    |          | 78   | 95     |          | 124  | 135    |          |
| Recurrent       |           |       |        |          |      |        |          |        |        |          |      |        |          |      |        |          |       |        |          |      |        |          |      |        |          |
| Fusion negative | 9         | 170   | 178    | 0.099    | 73   | 76     | 0.637    | 111    | 105    | 0.068    | 73   | 58     | 0.458    | 138  | 148    | 0.906    | 86    | 82     | 0.813    | 88   | 84     | 0.239    | 127  | 143    | 0.637    |
| Fusion positive | 2         | 10    | 10     |          | 36   | 36     |          | 189    | 189    |          | 3    | 3      |          | 131  | 131    |          | 67    | 67     |          | 21   | 21     |          | 86   | 86     |          |
| Low risk        | 3         | 202   | 202    | 0.838    | 8    | 8      | 0.014    | 140    | 140    | 0.794    | 58   | 58     | 1        | 144  | 144    | 0.608    | 67    | 67     | 0.609    | 84   | 85     | 0.414    | 143  | 143    | 0.759    |
| High risk       | 8         | 122   | 125    |          | 80   | 76     |          | 123    | 121    |          | 59   | 3      |          | 135  | 148    |          | 86    | 82     |          | 73   | 43     |          | 113  | 106    |          |
| Survived        | 3         | 90    | 90     | 0.133    | 80   | 80     | 0.776    | 179    | 179    | 0.4      | 60   | 60     | 0.63     | 115  | 115    | 0.497    | 108   | 108    | 0.776    | 83   | 83     | 0.497    | 155  | 155    | 0.921    |
| Progressed      | 8         | 150   | 178    |          | 62   | 60     |          | 114    | 105    |          | 58   | 13     |          | 142  | 148    |          | 76    | 82     |          | 73   | 49     |          | 110  | 90     |          |

**Table S3.** The immunopositivity and the statistical results of pmTOR, pS6, Rictor, PFKP, LDHA, G6PDH, ATPB and GLS stainings in the studied cases according to PAX-FOXO fusion status, risk stratification and survival. (H-score < 100 – negative (neg.), H-score > 100 – positive (pos.)).

|                 | Total no. | pmTOR    |          |          | pS6      |          |          | Rictor   |          |          | PFKP     |          |          | LDHA     |          |          | G6PDH    |          |          | ATPB     |          |          | GLS      |          |          |
|-----------------|-----------|----------|----------|----------|----------|----------|----------|----------|----------|----------|----------|----------|----------|----------|----------|----------|----------|----------|----------|----------|----------|----------|----------|----------|----------|
|                 |           | Pos. (%) | Neg. (%) | <i>p</i> | Pos. (%) | Neg. (%) | <i>p</i> | Pos. (%) | Neg. (%) | <i>p</i> | Pos. (%) | Neg. (%) | <i>p</i> | Pos. (%) | Neg. (%) | <i>p</i> | Pos. (%) | Neg. (%) | <i>p</i> | Pos. (%) | Neg. (%) | <i>p</i> | Pos. (%) | Neg. (%) | <i>p</i> |
| Primary         |           |          |          |          |          |          |          |          |          |          |          |          |          |          |          |          |          |          |          |          |          |          |          |          |          |
| Fusion negative | 40        | 55       | 45       | 0.286    | 18       | 82       | 0.411    | 80       | 20       | 0.357    | 13       | 87       | 0.033    | 53       | 47       | 0.411    | 87       | 13       | 0.643    | 35       | 65       | 0.592    | 72       | 28       | 0.467    |
| Fusion positive | 5         | 80       | 20       |          | 0        | 100      |          | 100      | 0        |          | 60       | 40       |          | 40       | 60       |          | 80       | 20       |          | 40       | 60       |          | 80       | 20       |          |
| Low risk        | 12        | 75       | 25       | 0.142    | 0        | 100      | 0.094    | 92       | 8        | 0.302    | 8        | 92       | 0.302    | 67       | 33       | 0.26     | 92       | 8        | 0.302    | 25       | 75       | 0.3      | 83       | 17       | 0.223    |
| High risk       | 33        | 52       | 48       |          | 21       | 79       |          | 79       | 21       |          | 21       | 79       |          | 48       | 52       |          | 79       | 21       |          | 79       | 21       |          | 39       | 71       |          |
| Survived        | 32        | 57       | 48       | 0.745    | 16       | 84       | 0.68     | 81       | 19       | 0.58     | 16       | 84       | 0.672    | 58       | 42       | 0.347    | 84       | 16       | 0.42     | 34       | 66       | 0.528    | 71       | 29       | 0.589    |
| Progressed      | 13        | 62       | 38       |          | 15       | 85       |          | 85       | 15       |          | 23       | 77       |          | 46       | 54       |          | 77       | 23       |          | 38       | 62       |          | 69       | 31       |          |
| Recurrent       |           |          |          |          |          |          |          |          |          |          |          |          |          |          |          |          |          |          |          |          |          |          |          |          |          |
| Fusion negative | 9         | 78       | 22       | 0.109    | 11       | 89       | 0.818    | 50       | 50       | 0.333    | 33       | 67       | 0.509    | 89       | 11       | 0.345    | 22       | 78       | 0.491    | 56       | 44       | 0.273    | 56       | 44       | 0.273    |
| Fusion positive | 2         | 0        | 100      |          | 0        | 100      |          | 100      | 0        |          | 0        | 100      |          | 50       | 50       |          | 50       | 50       |          | 0        | 100      |          | 0        | 100      |          |
| Low risk        | 3         | 67       | 33       | 0.721    | 0        | 100      | 0.727    | 67       | 33       | 0.333    | 0        | 100      | 0.339    | 100      | 0        | 0.509    | 0        | 100      | 0.339    | 67       | 33       | 0.424    | 33       | 67       | 0.576    |
| High risk       | 8         | 63       | 37       |          | 13       | 87       |          | 57       | 43       |          | 38       | 62       |          | 75       | 25       |          | 38       | 62       |          | 38       | 62       |          | 50       | 50       |          |
| Survived        | 3         | 33       | 67       | 0.279    | 0        | 100      | 0.727    | 100      | 0        | 0.333    | 33       | 67       | 0.661    | 67       | 33       | 0.491    | 33       | 67       | 0.661    | 67       | 33       | 0.424    | 67       | 33       | 0.424    |
| Progressed      | 8         | 75       | 25       |          | 13       | 88       |          | 50       | 50       |          | 25       | 75       |          | 88       | 13       |          | 25       | 75       |          | 38       | 63       |          | 38       | 63       |          |

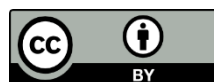

© 2020 by the authors. Licensee MDPI, Basel, Switzerland. This article is an open access article distributed under the terms and conditions of the Creative Commons Attribution (CC BY) license (<http://creativecommons.org/licenses/by/4.0/>).
